# Supplementary material for: Prospective Associations of Maternal Dietary Patterns and Postpartum Mental Health in a Multi-Ethnic Asian Cohort: The Growing up in Singapore towards Healthy Outcomes (GUSTO) Study
Source: MDPI journal article supplement (doi:10.3390/nu10030299), 2018-03-02
Supplement: s1 [file s1]

# Supplementary Materials: Prospective Associations of Maternal Dietary Patterns and Postpartum Mental Health in a Multi-ethnic Asian Cohort: the Growing Up in Singapore Towards Healthy Outcomes (GUSTO) Study

Cherlyen Teo, Ai-Ru Chia, Marjorelee T. Colega, Ling-Wei Chen, Doris Fok, Wei Wei Pang, Keith M. Godfrey, Kok Hian Tan, Fabian Yap, Lynette Pei-Chi Shek, Yap-Seng Chong, Michael Meaney, Helen Chen, Mary Foong-Fong Chong \*

**Table S1.**List of 84 food groups.

| Food Groups                                      |                                                              |
|--------------------------------------------------|--------------------------------------------------------------|
| Poultry (NF)                                     | Soya bean drinks                                             |
| Red meat (NF)                                    | Coffee and tea                                               |
| Meat (F)                                         | Herbal tea                                                   |
| Pig trotter/tail/skin dishes                     | Alcoholic drinks                                             |
| Meat products and dried and preserved meat       | Essence drinks                                               |
| Other meat and innards                           | Dessert soup                                                 |
| Fish (NF)                                        | Kueh, pastries, biscuits, cookies                            |
| Fish (F)                                         | Dim sum and local savoury snacks (NF)                        |
| Seafood                                          | Dim sum and local savoury snacks(F)                          |
| Dried and preserved seafood and fish products    | Ice-cream                                                    |
| Eggs                                             | Chips/crisps                                                 |
| Vegetables-Cruciferous, Leafy, Yellow/Orange/Red | Blended oil                                                  |
| Other vegetables and stir fried/boiled potato    | PUFA/MUFA oil                                                |
| Deep-fried/mashed potato                         | Butter/ghee                                                  |
| Fresh fruits                                     | Margarine and peanut butter                                  |
| Fresh fruit juice                                | Other oils and fats (includes salad dressing and mayonnaise) |
| Fruits, canned/dried and preserved               | Cream/condensed/powder type soup                             |
| Bean curd                                        | Vegetable/meat/fish/seafood soup                             |
| Legumes/pulses                                   | Herbal-based soup                                            |
| Nuts and oily seeds                              | Tomato-based gravies                                         |
| White rice                                       | Cream-based gravies                                          |
| Brown/red rice                                   | Curry-based gravies                                          |
| Flavoured rice                                   | Soya sauce based gravies                                     |
| Porridge                                         | Others sauces/gravies                                        |
| Other grains                                     | Sugar, honey, syrup, condensed milk                          |
| Breakfast cereals and cereal bars                | Sweet spreads                                                |
| Noodles (in soup)                                | Sweets and chocolates                                        |
| Flavoured noodles                                | Burgers                                                      |
| Pasta                                            | Pizza                                                        |
| White bread                                      | Other fast food items                                        |
| Wholemeal/multigrain bread                       | Food cooked with wine or alcohol*                            |

|                                   |                            |
|-----------------------------------|----------------------------|
| Ethnic bread                      | Food cooked with vinegar*  |
| Bread with sweet/savoury fillings | Sesame oil*                |
| Low-fat/ skimmed milk             | Traditional dried fruits*  |
| Whole milk                        | Traditional Chinese herbs* |
| Formula milk                      | Malay/Indonesian herbs     |
| Milk-based drinks                 | Indian herbs*              |
| Yoghurt and cultured drinks       | Allium*                    |
| Full cream/ low-fat cheese        | Garlic*                    |
| Milk (others)                     | Rhizomes*                  |
| Carbonated drinks                 | Seed herbs*                |
| Sweetened and cordial drinks      | Dried herbs*               |

\* Frequency of food intake was recorded. F = Deep-fried or cooked in curry/coconut based gravies; NF = Stir-fried, pan-fried, braised, stewed, boiled, steamed, grilled, baked or roasted preparation.

**Table S2.** Characteristics of eligible participants included in study and those who did not participate.<sup>1</sup>

| Characteristics of study participants                | Included<br>( <i>n</i> = 490) | Not included<br>( <i>n</i> = 759) | <i>P</i> |
|------------------------------------------------------|-------------------------------|-----------------------------------|----------|
| Maternal Age, years                                  | 31.4 ± 4.8                    | 30.1 ± 5.3                        | <0.001   |
| Parity, <i>n</i> (%)                                 |                               |                                   |          |
| 0                                                    | 222 (45.3)                    | 320 (46.1)                        | 0.830    |
| >0                                                   | 268 (54.7)                    | 374 (53.9)                        |          |
| Ethnicity, <i>n</i> (%)                              |                               |                                   | <0.001   |
| Chinese                                              | 312 (63.7)                    | 386 (50.9)                        |          |
| Malay                                                | 113 (23.1)                    | 212 (27.9)                        |          |
| Indian                                               | 65 (13.3)                     | 161 (21.2)                        |          |
| Education, <i>n</i> (%)                              |                               |                                   | <0.001   |
| Primary and Secondary                                | 110 (22.7)                    | 259 (34.9)                        |          |
| Post-secondary                                       | 166 (34.2)                    | 262 (35.3)                        |          |
| University                                           | 209 (43.1)                    | 222 (29.9)                        |          |
| Pregnancy BMI, kg/m <sup>2</sup>                     | 25.9 ± 4.2                    | 26.4 ± 4.63                       | 0.045    |
| Mode of infant feeding at 1st Month,<br><i>n</i> (%) |                               |                                   | <0.001   |
| Exclusively Breastfed                                | 140 (28.7)                    | 126 (21.3)                        |          |
| Partially Breastfed                                  | 304 (62.3)                    | 373 (63.1)                        |          |
| Formula Fed                                          | 44 (9)                        | 92 (15.6)                         |          |

<sup>1</sup>Values presented are mean ± SD or *n* (%). *P*-values are determined by independent T-test (continuous variables) and chi-square analysis (categorical variables). Number of missing data for Parity (*n* = 64), Education (*n* = 19), Pregnancy BMI (*n* = 87), mode of infant feeding during 1<sup>st</sup> month (*n* = 168).

**Table S3.** Additional characteristics of participants by tertiles of dietary pattern scores ( $n = 490$ ).<sup>1</sup>

|                                                          | Traditional Chinese Confinement Diet |            |            |                   | Traditional Indian Confinement Diet |            |            |                   | Eat-Out Diet |            |            |                   | Soup, Vegetables and Fruits Diet |            |            |                   |
|----------------------------------------------------------|--------------------------------------|------------|------------|-------------------|-------------------------------------|------------|------------|-------------------|--------------|------------|------------|-------------------|----------------------------------|------------|------------|-------------------|
|                                                          | T1                                   | T2         | T3         | <i>p</i> -Trend   | T1                                  | T2         | T3         | <i>p</i> -Trend   | T1           | T2         | T3         | <i>p</i> -Trend   | T1                               | T2         | T3         | <i>p</i> -Trend   |
| Maternal Characteristics                                 |                                      |            |            |                   |                                     |            |            |                   |              |            |            |                   |                                  |            |            |                   |
| Pregnancy BMI, kg/m <sup>2</sup>                         | 27.0 ± 4.7                           | 26.0 ± 4.1 | 24.7 ± 3.2 | <0.001            | 25.7 ± 4.2                          | 25.8 ± 4.2 | 26.2 ± 4.0 | 0.31              | 25.7 ± 4.3   | 25.2 ± 4.8 | 26.8 ± 4.2 | 0.004             | 26.6 ± 4.5                       | 26.2 ± 4.4 | 24.8 ± 3.2 | <0.001            |
| Married, %                                               | 33                                   | 33         | 34         | 0.02 <sup>2</sup> | 33                                  | 34         | 34         | 0.18 <sup>2</sup> | 33           | 34         | 33         | 0.47 <sup>2</sup> | 33                               | 33         | 34         | 0.35 <sup>2</sup> |
| Planned pregnancy, %                                     | 31                                   | 30         | 39         | 0.02              | 30                                  | 33         | 37         | 0.07              | 32           | 36         | 32         | 0.65              | 27                               | 31         | 43         | <0.001            |
| Lifestyle Factors                                        |                                      |            |            |                   |                                     |            |            |                   |              |            |            |                   |                                  |            |            |                   |
| Smoked or exposed to smoke before or during pregnancy, % | 44                                   | 32         | 24         | <0.001            | 38                                  | 34         | 27         | 0.01              | 38           | 28         | 35         | 0.74              | 49                               | 34         | 16         | <0.001            |
| Alcohol consumption before or during pregnancy, %        | 25                                   | 29         | 46         | <0.001            | 40                                  | 32         | 28         | 0.03              | 33           | 35         | 32         | 0.73              | 22                               | 38         | 40         | <0.001            |
| Exercise extent during pregnancy, %                      |                                      |            |            | 0.35              |                                     |            |            | 0.19              |              |            |            | 0.05              |                                  |            |            | 0.03              |
| No exercise                                              | 39                                   | 38         | 23         |                   | 32                                  | 39         | 30         |                   | 52           | 32         | 16         |                   | 49                               | 23         | 29         |                   |
| Only gentle exercise                                     | 35                                   | 31         | 33         |                   | 35                                  | 33         | 32         |                   | 35           | 30         | 34         |                   | 36                               | 34         | 30         |                   |
| ≤150mins moderate exercise/week                          | 24                                   | 39         | 37         |                   | 35                                  | 31         | 34         |                   | 21           | 45         | 34         |                   | 18                               | 38         | 44         |                   |
| >150mins moderate exercise/week                          | 40                                   | 30         | 30         |                   | 19                                  | 39         | 42         |                   | 34           | 27         | 38         |                   | 42                               | 25         | 33         |                   |
| Employed at 26 weeks gestation, %                        | 32                                   | 33         | 35         | 0.33              | 35                                  | 35         | 30         | 0.02              | 32           | 34         | 34         | 0.25              | 30                               | 34         | 36         | 0.005             |
| Medical History                                          |                                      |            |            |                   |                                     |            |            |                   |              |            |            |                   |                                  |            |            |                   |
| GDM, %                                                   | 28                                   | 27         | 45         | 0.01              | 28                                  | 34         | 38         | 0.17              | 24           | 35         | 41         | 0.03              | 35                               | 29         | 36         | 0.7               |
| Past history of stillbirth, %                            | 27                                   | 48         | 25         | 0.48              | 37                                  | 45         | 19         | 0.11              | 39           | 47         | 14         | 0.03              | 14                               | 40         | 47         | 0.02              |
| Past history of abortion, %                              | 31                                   | 50         | 19         | 0.12              | 40                                  | 40         | 20         | 0.05              | 41           | 35         | 24         | 0.1               | 31                               | 37         | 31         | 0.33              |
| History of psychological suffering, %                    | 20                                   | 52         | 28         | 0.66 <sup>2</sup> | 42                                  | 20         | 38         | 0.62 <sup>2</sup> | 62           | 10         | 30         | 0.41 <sup>2</sup> | 12                               | 52         | 38         | 0.42 <sup>2</sup> |
| Characteristics at delivery and postpartum               |                                      |            |            |                   |                                     |            |            |                   |              |            |            |                   |                                  |            |            |                   |
| Preterm birth, %                                         | 35                                   | 35         | 30         | 0.78              | 52                                  | 26         | 22         | 0.09              | 17           | 43         | 39         | 0.27              | 39                               | 43         | 17         | 0.17              |
| Caesarean delivery, %                                    | 33                                   | 39         | 28         | 0.33              | 36                                  | 32         | 33         | 0.68              | 33           | 34         | 33         | 0.93              | 35                               | 37         | 28         | 0.24              |
| Social support for confinement (Yes), %                  | 31                                   | 34         | 34         | 0.002             | 34                                  | 33         | 33         | 0.74              | 34           | 34         | 32         | 0.05              | 32                               | 33         | 35         | 0.002             |
| Practice of confinement, %                               | 33                                   | 33         | 34         | 0.23              | 33                                  | 34         | 32         | 0.29              | 34           | 34         | 32         | 0.08              | 32                               | 34         | 34         | 0.08              |

<sup>1</sup> Values presented are mean ± SDs unless otherwise stated. *P*-trends were assessed by modelling median values of each tertile in linear regression analysis for continuous variables and through Cochran-Mantel-Haenszel chi-square test for linear trends for categorical variables. Number of missing values:  $n = 10$  (2.04%) for “Pregnancy BMI”,  $n = 9$  (1.84%) for “married”,  $n = 9$  (1.84%) for “smoked or exposed to smoke before or during pregnancy”,  $n = 8$  (1.63%) for “Alcohol consumption before or during

pregnancy",  $n = 3$  (0.61%) for "exercise extent during pregnancy",  $n = (1.02\%)$  for "Employed at 26 weeks gestation",  $n = 37$  (7.55%) for "planned pregnancy",  $n = 58$  (11.84%) for "GDM",  $n = 53$  (10.82%) for "past history of stillbirth",  $n = 53$  (10.82%) for "past history of abortion",  $n = 6$  (1.22%) for "history of psychological suffering",  $n = 2$  (0.41%) for "practice of confinement",  $n = 35$  (7.14%) for "support for confinement".<sup>2</sup> Tests may not be valid due to violation of chi-square assumption, i.e. more than 20% of the cells have expected cell counts less than 5
